# Supplementary material
Source: publisher figshare collection journal article supplement (https://springernature.figshare.com/ndownloader/files/15165377)
Supplement: Supplementary file [file 15165377]

## Supplementary note on variant filtration using GATK

The best practice guidelines for variant discovery using *GATK* recommend sequence variants to be filtered using Variant Quality Score Recalibration (VQSR) because it implements advanced machine learning-based methods to differentiate between true and false-positive variants. However, VQSR relies on sets of high confidence truth/training variants, which are currently not (publicly) available in cattle. Thus, we ran *GATK* with best practice recommendations for variant filtering when applying VQSR is not possible, i.e., we used a generic baseline hard-filtering threshold for each variant annotation (see <https://gatkforums.broadinstitute.org/GATK/discussion/2806/howto-apply-hard-filters-to-a-call-set>). This threshold-based filtering is commonly applied the cattle genomics community (Koufariotis *et al.* 2018; Chen *et al.* 2018).

To facilitate running the VQSR module in sheep and goat, i.e., species where sets of truth/training variants are not (publicly) available, Alberto and colleagues (2018) used an intersection of high confidence variants that had been discovered from multiple variant callers as truth/training sets, i.e., they derived truth/training sets directly from the analyzed data. We implemented their approach to apply *GATK* VQSR to our variant dataset. Training and truth sets were constructed using the overlap of the filtered variants from the *GATK*, *GraphTyper* and *SAMtools* pipelines (truth=false, training=true, known=false, prior= 10) and markers from the BovineHD BeadChip (truth=true, training=true, known=false, prior= 15), respectively. Moreover, we used variants listed in dbSNP (version 150) as known variants (truth=false, training=false, known=true, prior=3.0). Following *GATK* VQSR, we retained variants in the 99.9% tranche sensitivity threshold (best practice).

Variant filtration using *GATK* VQSR removed more variants from the raw data than *GATK* hard filtering (Table 1). However, VQSR retained more HD SNPs than *GATK* hard filtering, possibly reflecting bias that results from the use of HD SNPs as training/truth sets. The values of the concordance statistics (genotype concordance, non-reference sensitivity, non-reference discrepancy) were almost identical between *GATK* VQSR and *GATK* hard filtration (Table 2) indicating that the choice of either filtration option does not notably affect the concordance between sequence-derived and BovineHD SNP array-derived genotypes. These findings are in line with Vander Jagt *et al.* (2018) who showed that the concordance between microarray-called and sequence-derived genotypes is almost identical using either *GATK* VQSR or the *GATK* 1000 bull genomes project hard filters, even though they used stringently filtered truth/training sets based on a more comprehensive catalogue of variants than in our study. Interestingly, in agreement with Vander Jagt *et al.* (2018), the proportion of opposing homozygous genotypes in sire/son-pairs (which does not suffer from ascertainment bias because it is calculated using sequence-derived SNPs) is less using *GATK* hard filter than *GATK* VQSR.

The performance of *GATK* VQSR may be assessed using the novel variant sensitivity tranche plot (Figure 2). In the lowest 90% tranches (highest specificity) the filtering model still retained many false positive variants (orange box and low Ti/Tv ratio). However, when the 99.9% tranche sensitivity is used as filtration criterion as recommended by the *GATK* best practice guidelines, a high proportion of true positive variants is removed from the data.

Overall, our findings suggest that

- (i) *GATK* VQSR removes more variants from the data than *GATK* hard filtering,
- (ii) *GATK* VQSR does not notably improve the concordance between sequence-derived and microarray-called genotypes compared to *GATK* hard filtering,
- (iii) the proportion of opposing homozygous genotypes in sire/son-pairs is higher using *GATK* VQSR than *GATK* hard filtering, and
- (iv) improving VQSR may be possible by providing more sophisticated truth/training variant datasets produced by orthogonal sequencing technology other than the ones used for training, e.g. (Li *et al.* 2018).

**Table 1** Comparison of variants statistics between unfiltered and filtered datasets using either hard-filtering or VQSR.

|               | <i>GATK</i> full | <i>GATK</i> hard-filter | <i>GATK</i> VQSR |
|---------------|------------------|-------------------------|------------------|
| Total SNPs    | 18,594,182       | 17,248,593              | 16,537,577       |
| Biallelic     | 18,347,962       | 17,111,806              | 16,430,734       |
| Multi-allelic | 246,220          | 136,787                 | 106,843          |
| Ti/Tv ratio   | 2.09             | 2.17                    | 2.16             |
| BovineHD      | 99.46            | 99.21                   | 99.38            |
| BovineSNP50   | 99.14            | 98.91                   | 98.98            |

**Table 2** The concordance statistics between hard-filtered and VQSR

|                         | Genotype concordance | Non-reference sensitivity | Non-reference discrepancy | Opposing Homozygous |
|-------------------------|----------------------|---------------------------|---------------------------|---------------------|
| <i>GATK</i> hard-filter | 96.02                | 93.67                     | 6.3                       | 0.72                |
| <i>GATK</i> VQSR        | 96.01                | 93.77                     | 6.32                      | 0.75                |

**Figure 1** Tranche sensitivity plot of novel variants as reported by the VQSR model fitting

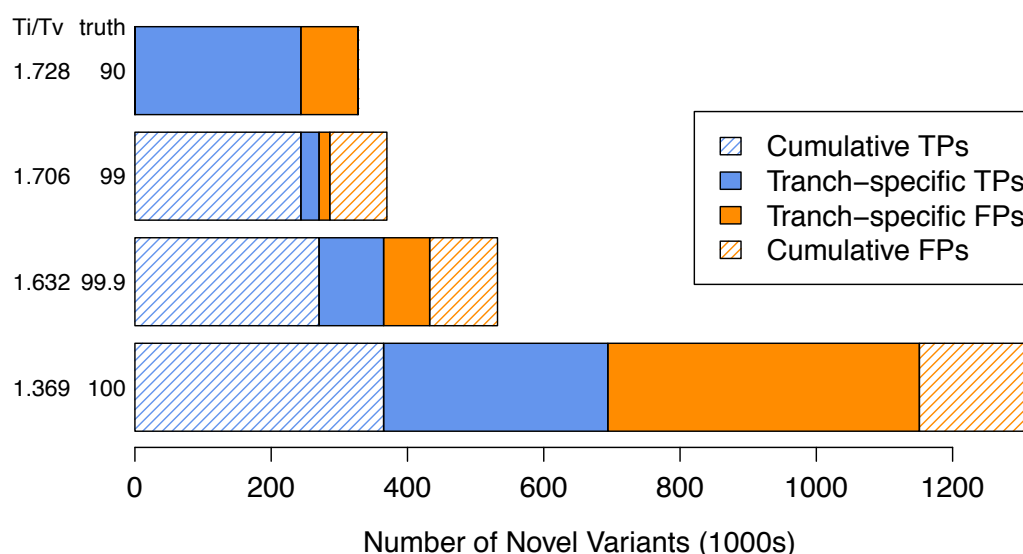

## References

- Alberto F. J., F. Boyer, P. Orozco-terWengel, I. Streeter, B. Servin, *et al.*, 2018 Convergent genomic signatures of domestication in sheep and goats. *Nat. Commun.* 9: 813. <https://doi.org/10.1038/s41467-018-03206-y>
- Chen N., Y. Cai, Q. Chen, R. Li, K. Wang, *et al.*, 2018 Whole-genome resequencing reveals world-wide ancestry and adaptive introgression events of domesticated cattle in East Asia. *Nat. Commun.* 9: 2337. <https://doi.org/10.1038/s41467-018-04737-0>
- Koufariotis L., B. J. Hayes, M. Kelly, B. M. Burns, R. Lyons, *et al.*, 2018 Sequencing the mosaic genome of Brahman cattle identifies historic and recent introgression including polled. *Sci. Rep.* 8: 17761. <https://doi.org/10.1038/s41598-018-35698-5>
- Li H., J. M. Bloom, Y. Farjoun, M. Fleharty, L. Gauthier, *et al.*, 2018 A synthetic-diploid benchmark for accurate variant-calling evaluation. *Nat. Methods* 15: 595–597. <https://doi.org/10.1038/s41592-018-0054-7>
- Vander Jagt CJ, Chamberlain AJ, Schnabel RD, Hayes BJ, Daetwyler HD. Which is the best variant caller for large whole-genome sequencing datasets?. *Proc. 11th World Congr. Genet. Appl. Livest. Prod. (WCGALP)*, 11.128, Auckland, New Zealand, Accessed Feb. 1, 2019.
